# Supplementary material
Source: publisher figshare collection journal article supplement (https://acs.figshare.com/ndownloader/files/28828725)
Supplement: Supplementary file 1 [file 28828725]

## Supporting Information

# Versatile Interfacial Self-Assembly of $\text{Ti}_3\text{C}_2\text{T}_x$ MXene Based Composites with Enhanced Kinetics for Superior Lithium and Sodium Storage

*Zhengguang Zou, Qian Wang\*, Jun Yan\*, Kai Zhu, Ke Ye, Guiling Wang, Dianxue Cao*

Key Laboratory of Superlight Materials and Surface Technology, Ministry of Education,  
College of Materials Science and Chemical Engineering, Harbin Engineering University,  
Harbin 150001, China

\*Corresponding authors.

Jun Yan, E-mail: [yanjun198201@vip.163.com](mailto:yanjun198201@vip.163.com), [yanjun@hrbeu.edu.cn](mailto:yanjun@hrbeu.edu.cn)

Qian Wang, E-mail: [wangqianhrb@163.com](mailto:wangqianhrb@163.com)

## Content

|                                                                                                                                                                                                                                                                                                                                                                 |     |
|-----------------------------------------------------------------------------------------------------------------------------------------------------------------------------------------------------------------------------------------------------------------------------------------------------------------------------------------------------------------|-----|
| <b>EXPERIMENTAL</b> .....                                                                                                                                                                                                                                                                                                                                       | S4  |
| <b>Figure S1.</b> Optical images during the interfacial self-assembly process. (A) Before self-assembly. (B) Self-assembly in progress. (C) After self-assembly. ....                                                                                                                                                                                           | S7  |
| <b>Figure S2.</b> Zeta potentials. (A) Ni <sub>9</sub> S <sub>8</sub> and Co-NiS, (B) GO and CNTs, (C) OA-GO and OA-CNTs, (D) MXene aqueous colloidal dispersion. ....                                                                                                                                                                                          | S8  |
| <b>Figure S3.</b> Optical images of of MXene dispersion mixed with OA (left) and OA in cyclohexane (right). ....                                                                                                                                                                                                                                                | S9  |
| <b>Figure S4.</b> FTIR spectra of the samples. (A) Samples without OA functionalization. (B) OA functionalized samples. ....                                                                                                                                                                                                                                    | S10 |
| <b>Figure S5.</b> Morphology characterizations of the Ni <sub>9</sub> S <sub>8</sub> /MXene composite. (A) TEM image of pure Ni <sub>9</sub> S <sub>8</sub> nanorods. (B) Low-resolution and (C) high-resolution TEM images. (D) HRTEM of Ni <sub>9</sub> S <sub>8</sub> /MXene. (E) EDS elemental mapping images. ....                                         | S11 |
| <b>Figure S6.</b> TEM images. (A-B) Co-NiS/MXene-5%. (C-D) Co-NiS/MXene-35%. ....                                                                                                                                                                                                                                                                               | S12 |
| <b>Figure S7.</b> N <sub>2</sub> adsorption/desorption isotherms of MXene and Co-NiS/MXene. ....                                                                                                                                                                                                                                                                | S13 |
| <b>Figure S8.</b> XRD patterns of (A) Ni <sub>9</sub> S <sub>8</sub> and Ni <sub>9</sub> S <sub>8</sub> /MXene composite, (B) Ni <sub>9</sub> S <sub>8</sub> , 1%Co-NiS, 2%Co-NiS and 10%Co-NiS. ....                                                                                                                                                           | S14 |
| <b>Figure S9.</b> XRD pattern of individual Ti <sub>3</sub> C <sub>2</sub> T <sub>x</sub> MXene. ....                                                                                                                                                                                                                                                           | S15 |
| <b>Figure S10.</b> Core-level spectrum of C 1s. ....                                                                                                                                                                                                                                                                                                            | S16 |
| <b>Figure S11.</b> GCD curves for sodium ion battery. (A) Ni <sub>9</sub> S <sub>8</sub> , (B) Co-NiS and (C) Co-NiS/MXene at different current densities. ....                                                                                                                                                                                                 | S17 |
| <b>Figure S12.</b> Electrochemical lithium storage performances of Ni <sub>9</sub> S <sub>8</sub> /MXene. (A) Rate performance of Ni <sub>9</sub> S <sub>8</sub> and Ni <sub>9</sub> S <sub>8</sub> /MXene. (B) GCD curves of Ni <sub>9</sub> S <sub>8</sub> . (B) Cycling performance of Ni <sub>9</sub> S <sub>8</sub> /MXene at 0.1 A g <sup>-1</sup> . .... | S18 |
| <b>Figure S13.</b> Electrochemical lithium storage performances of Co-NiS. (A) GCD curves at different current densities (10%Co-NiS). (B) Rate performances of the samples with different introduced amount Co. ....                                                                                                                                            | S19 |
| <b>Figure S14.</b> Electrochemical lithium storage performances of Co-NiS/MXene with different contents. (A) GCD curves at different current densities (20%MXene). (B) Specific capacities at different current densities. ....                                                                                                                                 | S20 |
| <b>Figure S15.</b> Rate performance of MXene for LIB. ....                                                                                                                                                                                                                                                                                                      | S21 |
| <b>Figure S16.</b> CV curves and capacitive contribution. (A-C) Ni <sub>9</sub> S <sub>8</sub> . (D-F) Ni <sub>9</sub> S <sub>8</sub> /MXene. (G-I) Co-NiS. ....                                                                                                                                                                                                | S22 |
| <b>Figure S17.</b> Enlarged profiles of Co-NiS/MXene GITT. ....                                                                                                                                                                                                                                                                                                 | S23 |
| <b>Figure S18.</b> GITT of Co-NiS (A) and diffusion coefficient (B). ....                                                                                                                                                                                                                                                                                       | S24 |
| <b>Figure S19.</b> Rate performance of MXene for SIB. ....                                                                                                                                                                                                                                                                                                      | S25 |

|                                                                                                                                             |     |
|---------------------------------------------------------------------------------------------------------------------------------------------|-----|
| <b>Figure S20.</b> CV curves and capacitive contribution. (A-C) $\text{Ni}_9\text{S}_8$ . (D-F) Co-NiS.....                                 | S26 |
| <b>Figure S21.</b> GITT (A) and calculated diffusion coefficient D for sodium ion battery (B)....                                           | S27 |
| <b>Figure S22.</b> Rate performance comparison of relevant materials for sodium ion battery in recently reported literatures. ....          | S28 |
| <b>Table S1.</b> Zeta potential of samples. ....                                                                                            | S29 |
| <b>Table S2.</b> Rate and cycle performance comparison of relevant materials for lithium ion battery in recently reported literatures. .... | S30 |
| <b>Table S3.</b> Rate and cycle performance comparison of relevant materials for sodium ion battery in recently reported literatures. ....  | S31 |
| <b>REFERENCES</b> .....                                                                                                                     | S32 |

## EXPERIMENTAL

**Chemicals.** All the chemicals used in this work were of analytical grade and used as received without further purification.  $\text{Ti}_3\text{AlC}_2$  was purchased from 11 Technology Co., Ltd (Jilin, China). Cyclohexane was Tianjin Fuyu Fine Chemical Co. Ltd (China). Concentrated hydrochloric acid (HCl), nickel chloride hexahydrate ( $\text{NiCl}_2 \cdot 6\text{H}_2\text{O}$ ) and cobalt chloride hexahydrate ( $\text{CoCl}_2 \cdot 6\text{H}_2\text{O}$ ) were obtained from Sinopharm Chemical Reagent Co. Ltd (China). *n*-dodecyl mercaptan ( $\text{C}_{12}\text{H}_{26}\text{S}$ ), Oleylamine ( $\text{C}_{18}\text{H}_{37}\text{N}$ ) and lithium fluoride (LiF) were purchased from Aladdin.

**Preparation of MXene nanosheets.** 2.5 mL of ultrapure water and 7.5 mL of hydrochloric acid were mixed and stirred for several minutes. Then 0.8 g of LiF was added. After 10 minutes later, 0.5 g of MAX ( $\text{Ti}_3\text{AlC}_2$ ) was added slowly. Then, the mixed solution was transferred in water bath pot (40 °C) for 36 hours. Then the obtained solution was washed and centrifuged (3500 rpm) with ultrapure water for several times. Sediment and 50 mL of ultrapure water was sonicated for 1 h with the protection of  $\text{N}_2$  atmosphere. Then the mixed solution was centrifuged for 1 h. Finally, the MXene aqueous solution was obtained.

**Structural characterization.** X-ray diffraction patterns were characterized by Rigaku D/MAX-TTR III powder X-ray diffractometer with Cu  $\text{K}\alpha$  ( $\lambda = 0.15406$  nm) radiation in the  $2\theta$  range of 5-80°. The XPS data was collected by a PHI 5700 ESCA X-ray photoelectron spectrometer with an Al  $\text{K}\alpha$  X-ray source. The morphology analysis of the materials was characterized by transmission electron microscope (TEM, FEI, Talos F200X G2). Fourier transform infrared (FT-IR) spectroscopy was carried out on a Perkin-Elmer 580B IR spectrophotometer using KBr pellets.

**Electrochemical measurements.** All electrochemical tests were conducted in CR2032 coin cells. For the preparation of anodes, active material (65 wt.%), super P (20 wt.%) and carboxymethyl cellulose (CMC, 15 wt.%) were mixed with deionized water in a mortar to make a homogeneous slurry, which was then uniformly coated onto a copper foil with a scraper and dried at 60 °C in a vacuum oven for at 24 h. The mass loading of active material was 1.5 mg cm<sup>-2</sup> in each electrode.

For the assembly of Li-ion half cells, porous polypropylene film (Celgard 2400) was used as the separator and 1 M LiPF<sub>6</sub> dissolved in a mixture of ethylene carbonate/dimethyl carbonate/ethyl methyl carbonate (EC/DMC/EMC, 1:1:1, v/v/v) was used as the electrolyte. Coin cells were assembled with lithium metal sheet as the counter and reference electrodes in an argon-filled glove box (H<sub>2</sub>O and O<sub>2</sub> < 0.01 ppm). All the electrode potential of the cells reported in this work is referred to the Li<sup>+</sup>/Li reference electrode unless otherwise specified.

For the assembly of Na-ion half cells, glass fiber filters (Whatman GF/D) were used as the separator and 1 M NaClO<sub>4</sub> dissolved in a mixture of ethylene carbonate/dimethyl carbonate/ethyl methyl carbonate (EC/DMC/EMC, 1:1:1, Vol%) with 5.0% FEC was used as the electrolyte. Coin cells were assembled with sodium metal sheet as the counter and reference electrodes in an argon-filled glove box (H<sub>2</sub>O and O<sub>2</sub> < 0.01 ppm). All the electrode potential of the cells reported in this work is referred to the Na<sup>+</sup>/Na reference electrode unless otherwise specified.

Galvanostatic charge-discharge cycles were tested using a NEWARE battery testing system (CT-4008) at various current densities between 3 and 0.01 V at room temperature.

Cyclic voltammetry measurements were carried out on an electrochemical station (VMP3, Bio-Logic) within a potential window of 0.01-3 V. Electrochemical impedance spectra were analyzed on a VMP3 electrochemical station with the AC amplitude of 5 mV in the frequency range of 100 kHz to 0.01 Hz.

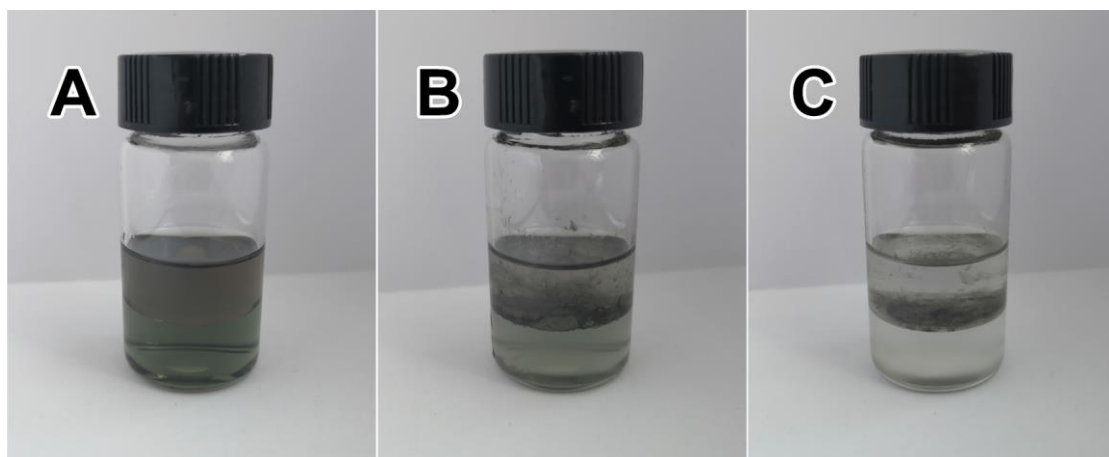

**Figure S1.** Optical images during the interfacial self-assembly process. (A) Before self-assembly. (B) Self-assembly in progress. (C) After self-assembly.

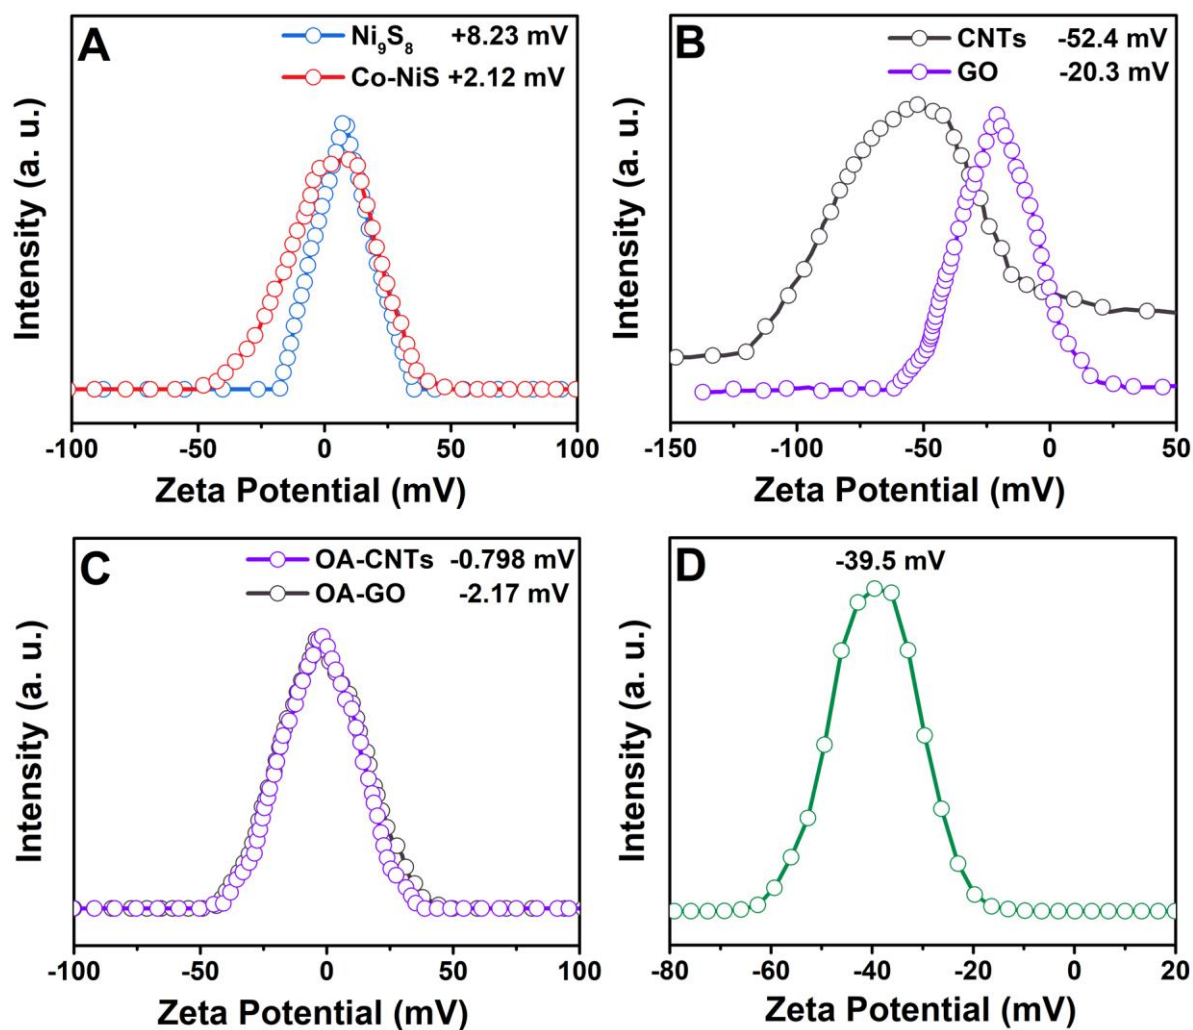

**Figure S2.** Zeta potentials. (A)  $\text{Ni}_9\text{S}_8$  and Co-NiS. (B) GO and CNTs. (C) OA-GO and OA-CNTs. (D)  $\text{Ti}_3\text{C}_2\text{T}_x$  MXene aqueous colloidal dispersion.



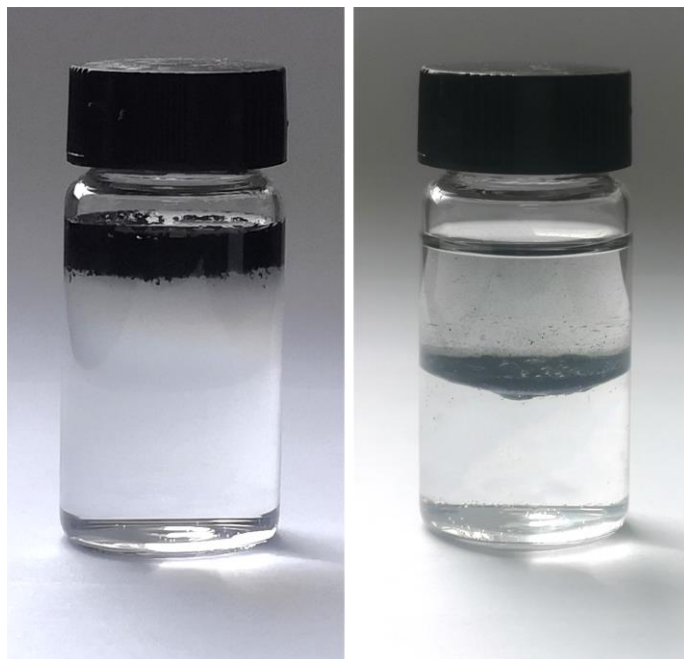

**Figure S3.** Optical images of  $\text{Ti}_3\text{C}_2\text{T}_x$  MXene dispersion mixed with OA (left) and OA in cyclohexane (right).

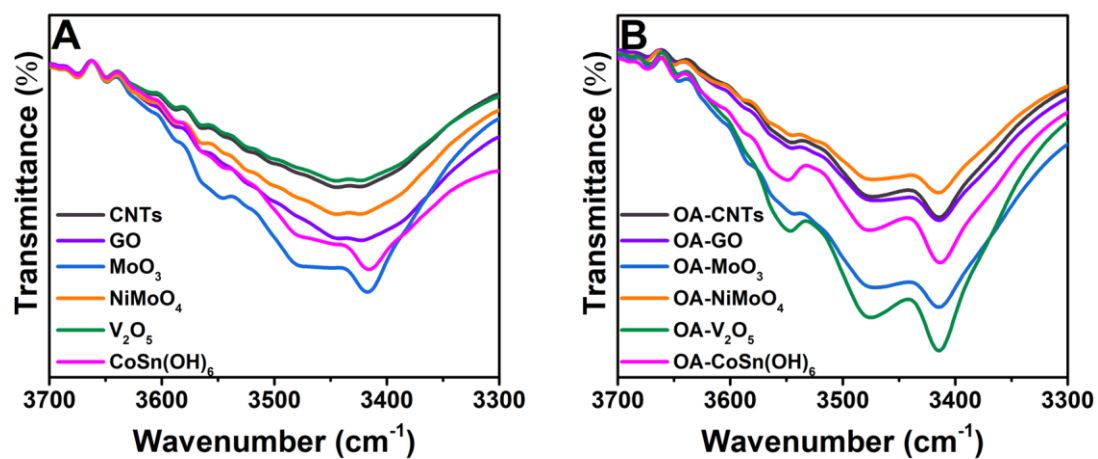

**Figure S4.** FT-IR spectra of the samples. (A) Samples without OA functionalization. (B) OA functionalized samples.

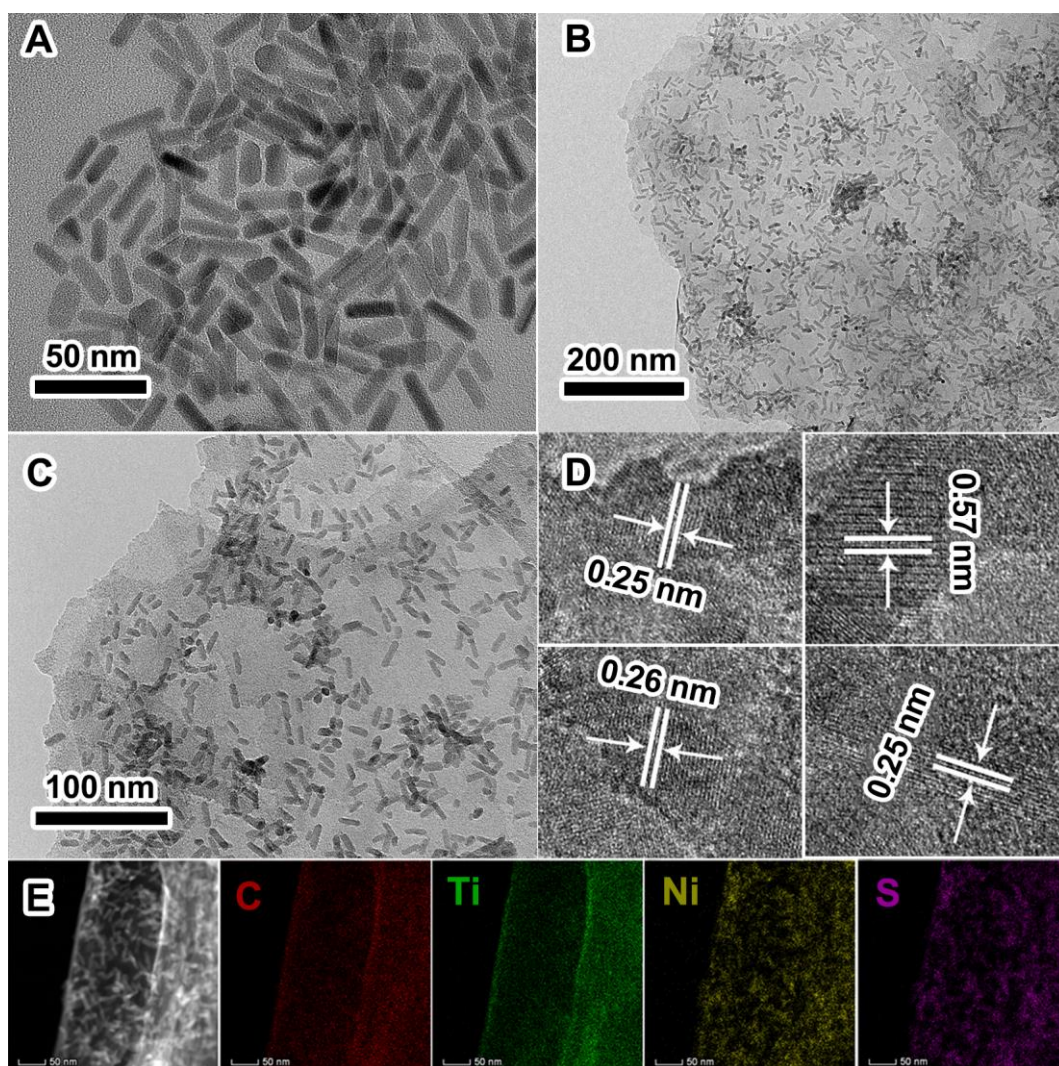

**Figure S5.** Morphology characterizations of the  $\text{Ni}_9\text{S}_8/\text{MXene}$  composite. (A) TEM image of pure  $\text{Ni}_9\text{S}_8$  nanorods. (B) Low-resolution and (C) high-resolution TEM images. (D) HRTEM of  $\text{Ni}_9\text{S}_8/\text{MXene}$ . (E) EDS elemental mapping images.



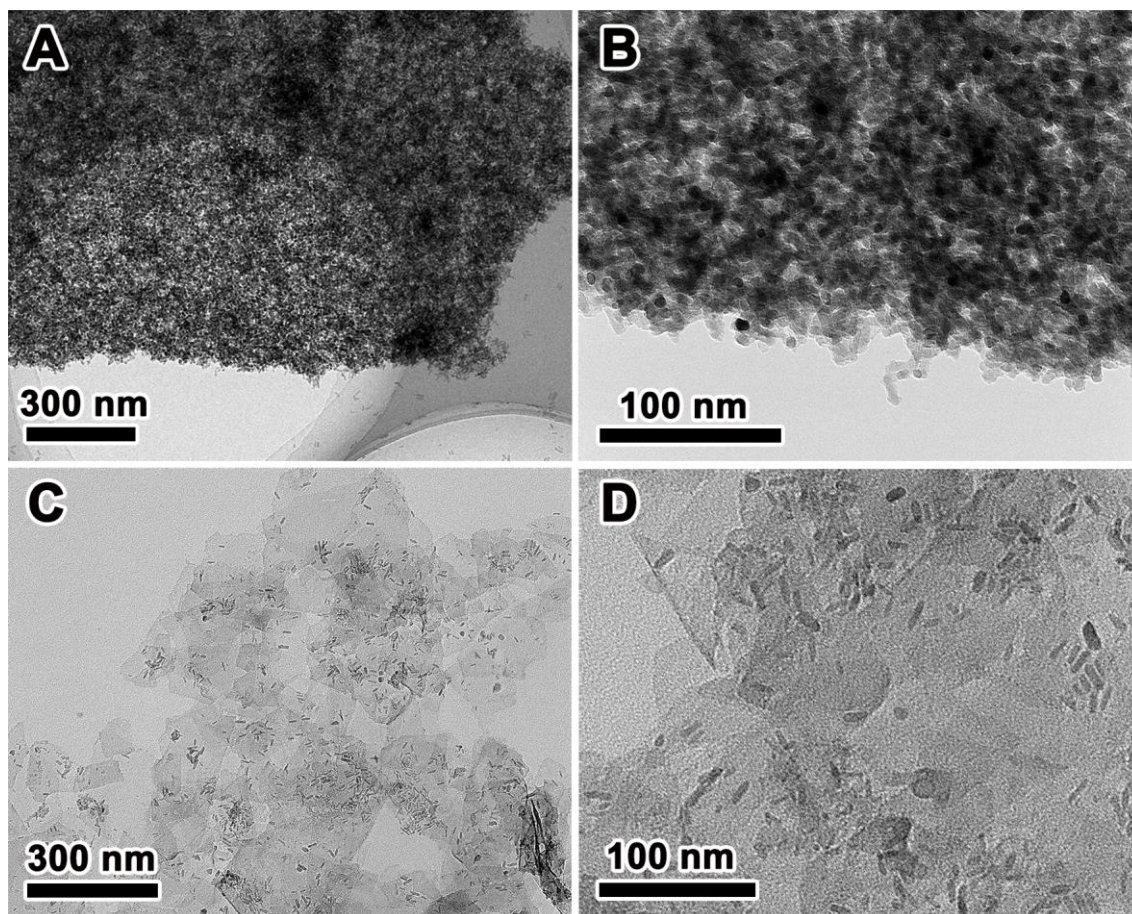

**Figure S6.** TEM images. (A-B) Co-NiS/MXene-5%. (C-D) Co-NiS/MXene-35%.

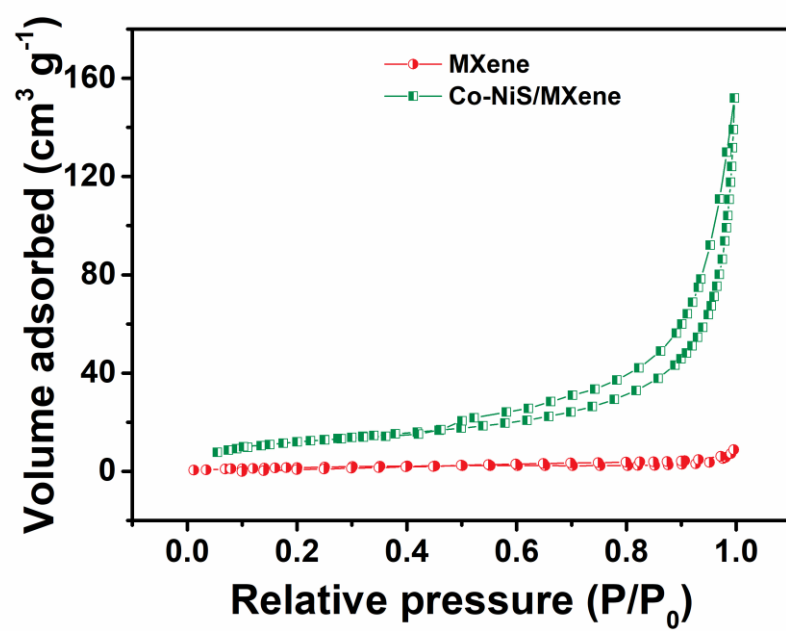

**Figure S7.** N<sub>2</sub> adsorption/desorption isotherms of MXene and Co-NiS/MXene.

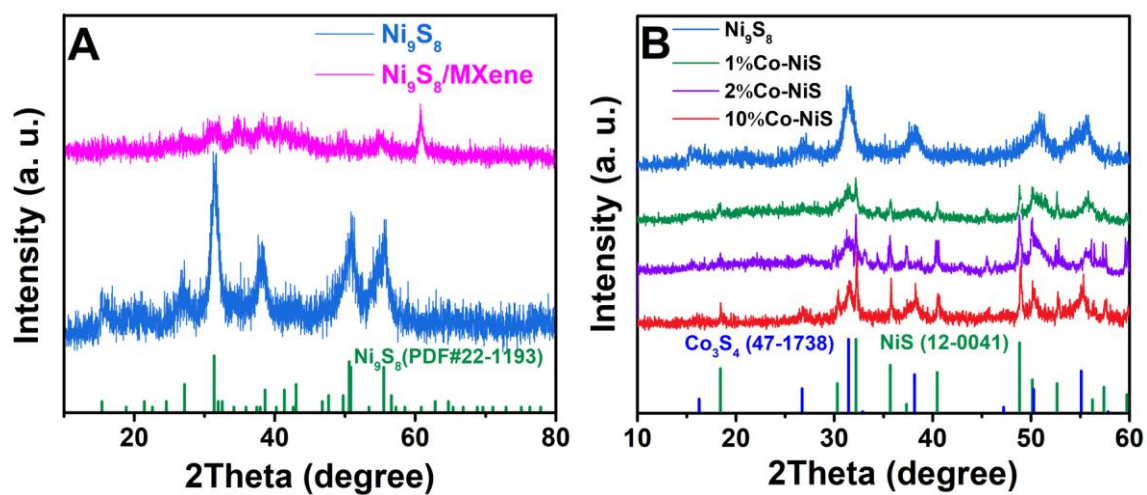

**Figure S8.** XRD patterns of (A)  $\text{Ni}_9\text{S}_8$  and  $\text{Ni}_9\text{S}_8/\text{MXene}$  composite, (B)  $\text{Ni}_9\text{S}_8$ , 1%Co-NiS, 2%Co-NiS and 10%Co-NiS.

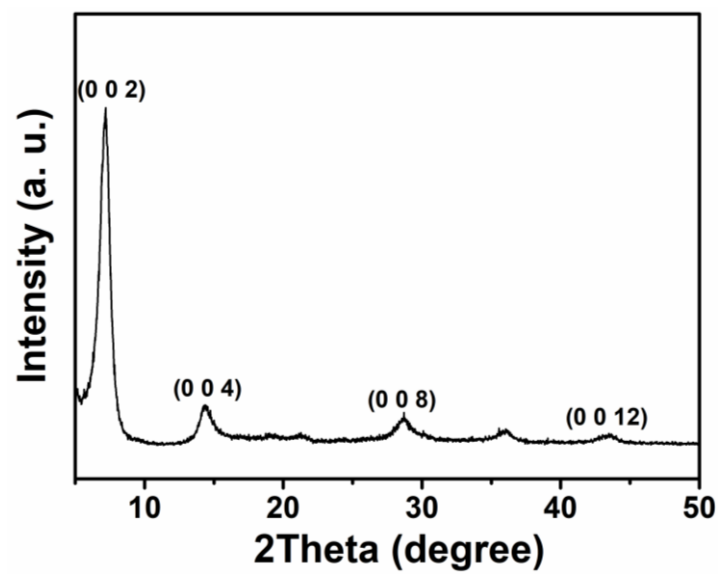

**Figure S9.** XRD pattern of individual  $\text{Ti}_3\text{C}_2\text{T}_x$  MXene.

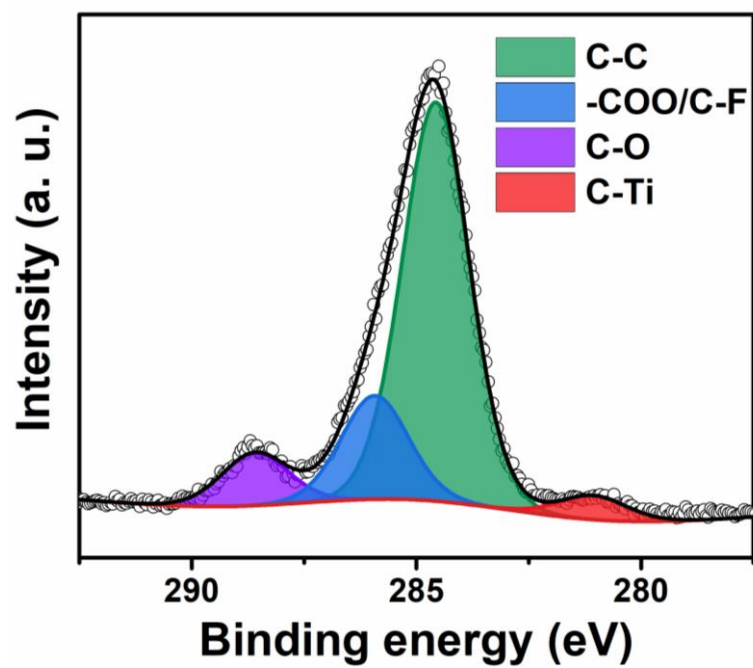

**Figure S10.** Core-level C 1s spectrum of the Co-NiS/MXene composite.



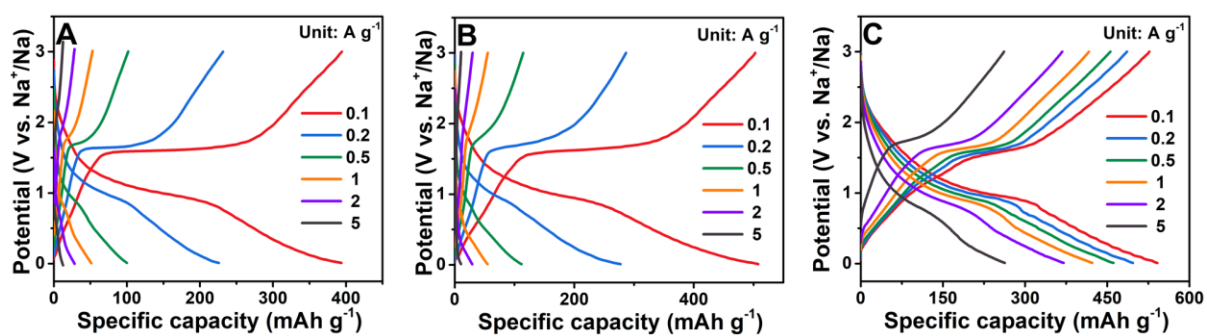

**Figure S11.** GCD curves for sodium ion batteries. (A) Ni<sub>9</sub>S<sub>8</sub>, (B) Co-NiS and (C) Co-NiS/MXene at different current densities.

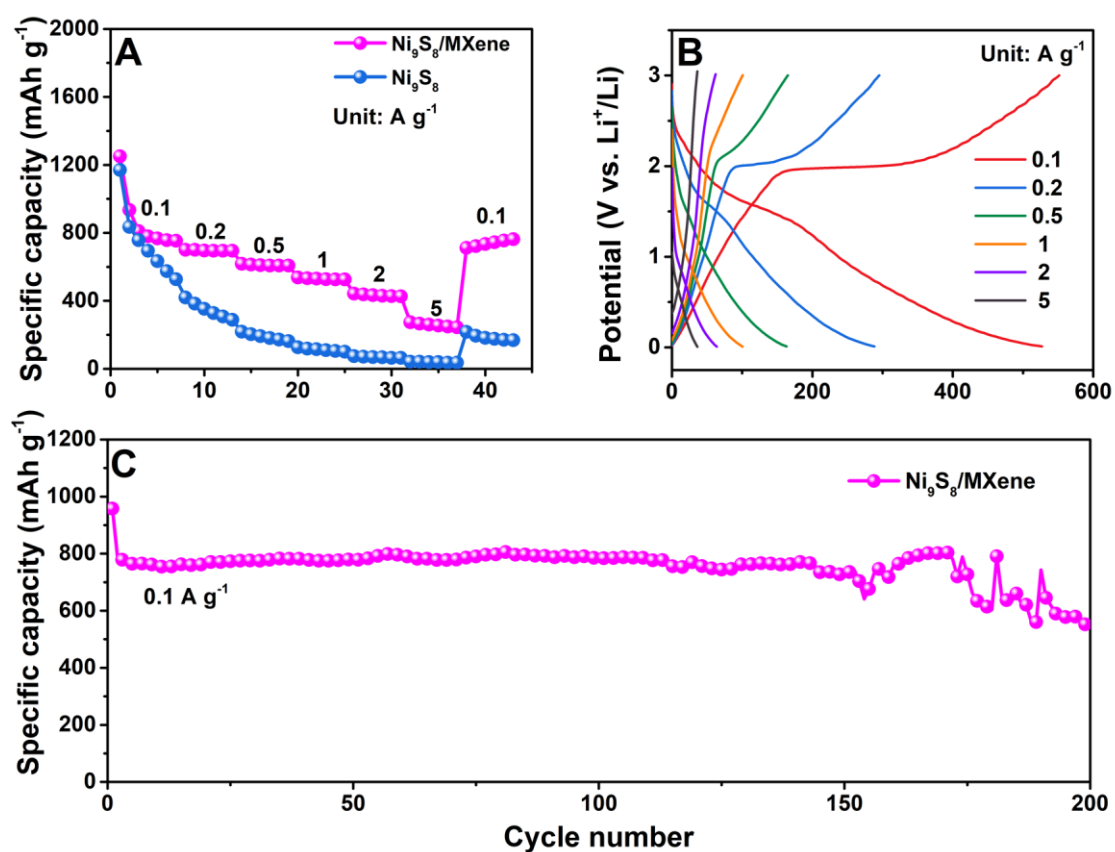

**Figure S12.** Electrochemical lithium storage performances. (A) Rate performance of  $\text{Ni}_9\text{S}_8$  and  $\text{Ni}_9\text{S}_8/\text{MXene}$ . (B) GCD curves of  $\text{Ni}_9\text{S}_8$ . (B) Cycling performance of the  $\text{Ni}_9\text{S}_8/\text{MXene}$  composite at  $0.1 \text{ A g}^{-1}$ .

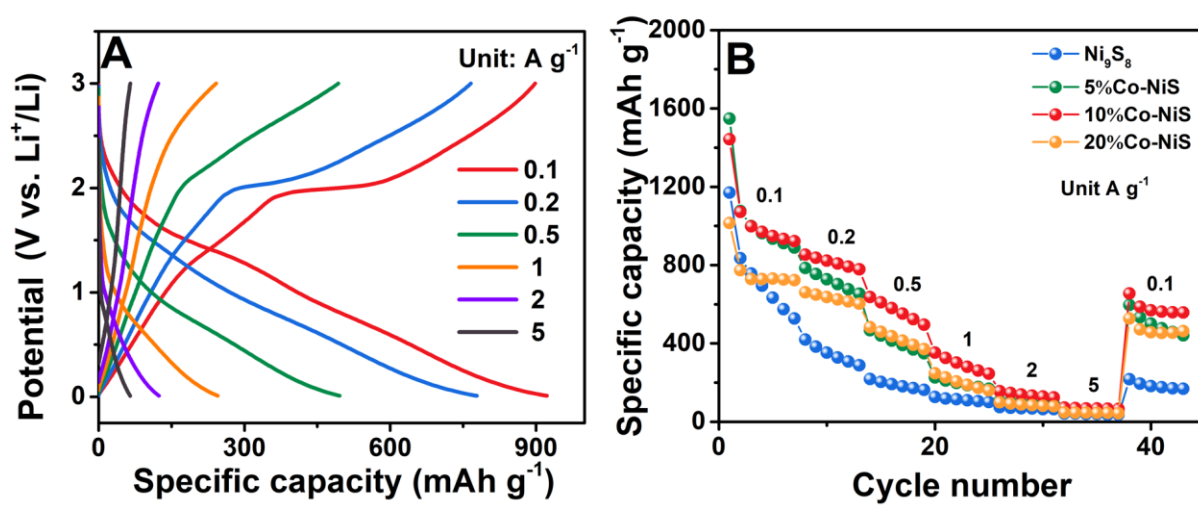

**Figure S13.** Electrochemical lithium storage performances of Co-NiS. (A) GCD curves at different current densities (10%Co-NiS). (B) Rate performances of the samples with different amounts of introduced Co.

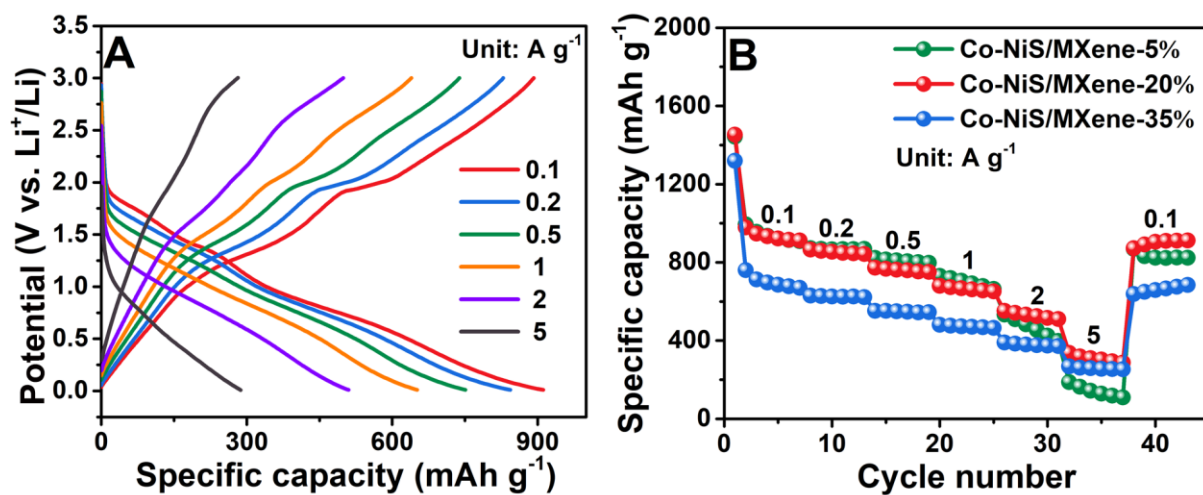

**Figure S14.** Electrochemical lithium storage performances of Co-NiS/MXene with different content of MXene. (A) GCD curves of the Co-NiS/MXene-20% at different current densities. (B) Specific capacities at different current densities.

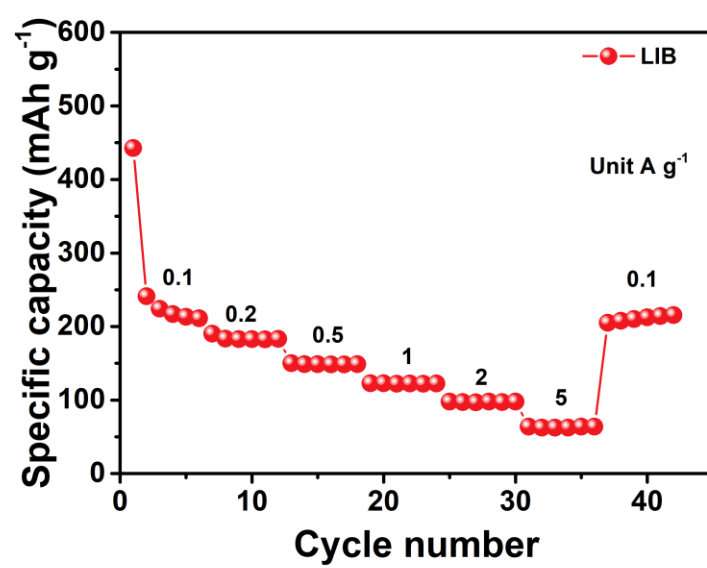

**Figure S15.** Rate performance of pure MXene for LIB.

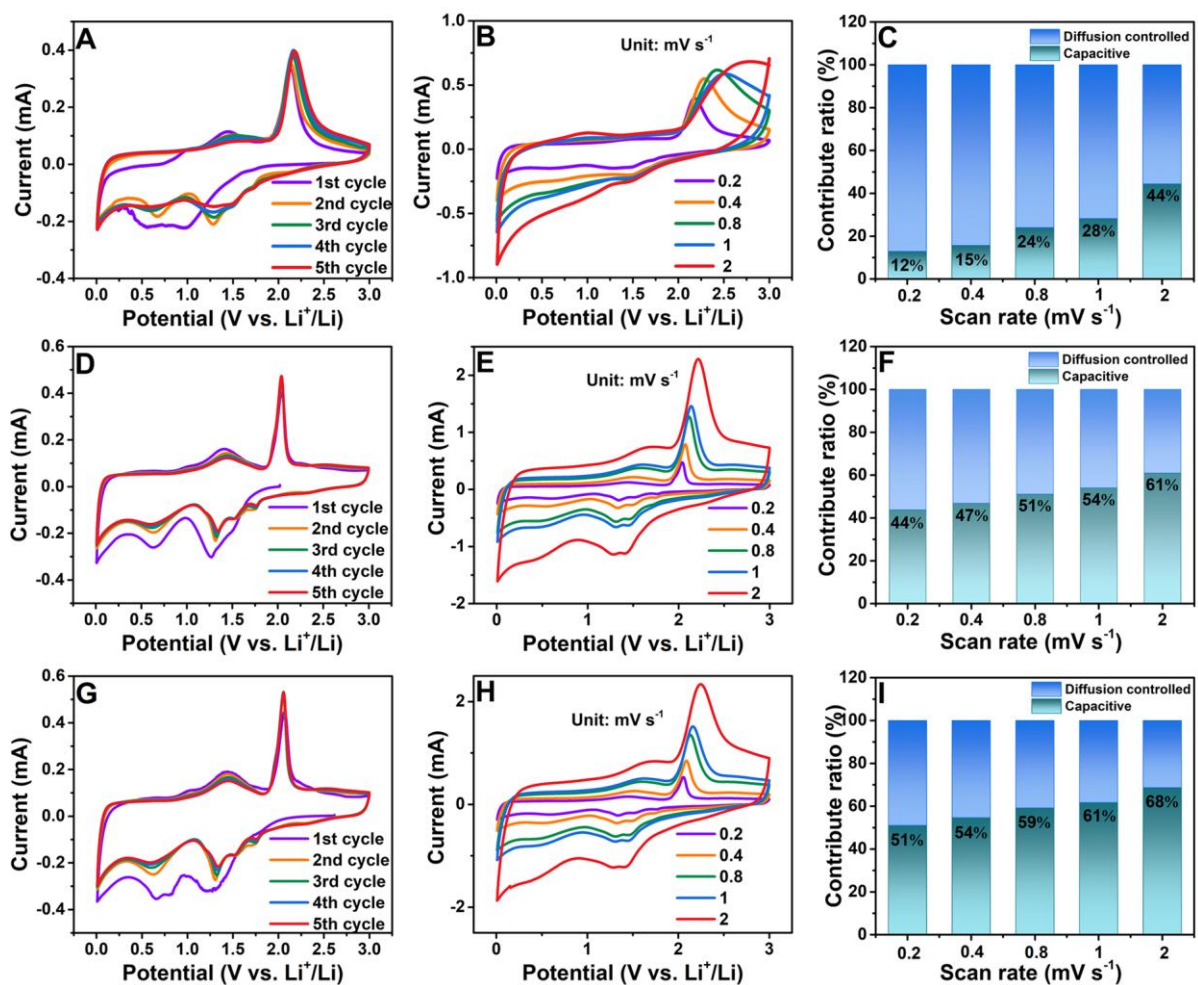

**Figure S16.** CV curves and capacitive contribution. (A-C) Ni<sub>9</sub>S<sub>8</sub>. (D-F) Ni<sub>9</sub>S<sub>8</sub>/MXene. (G-I) Co-NiS.

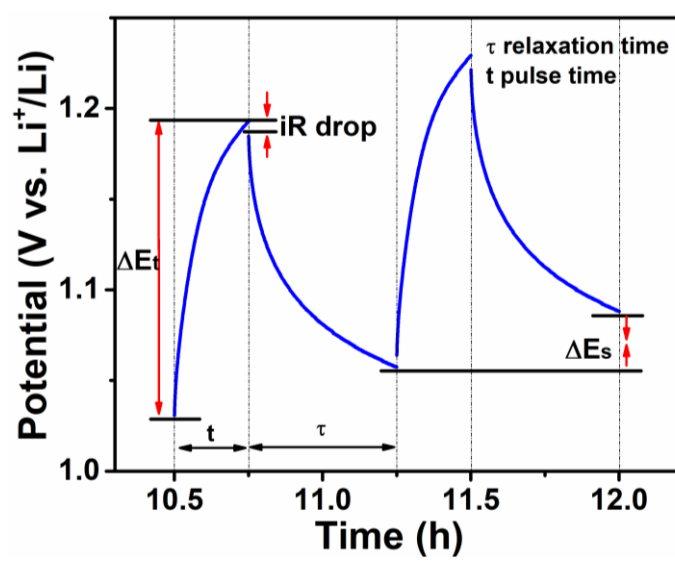

**Figure S17.** Enlarged GITT profiles of the Co-NiS/MXene.

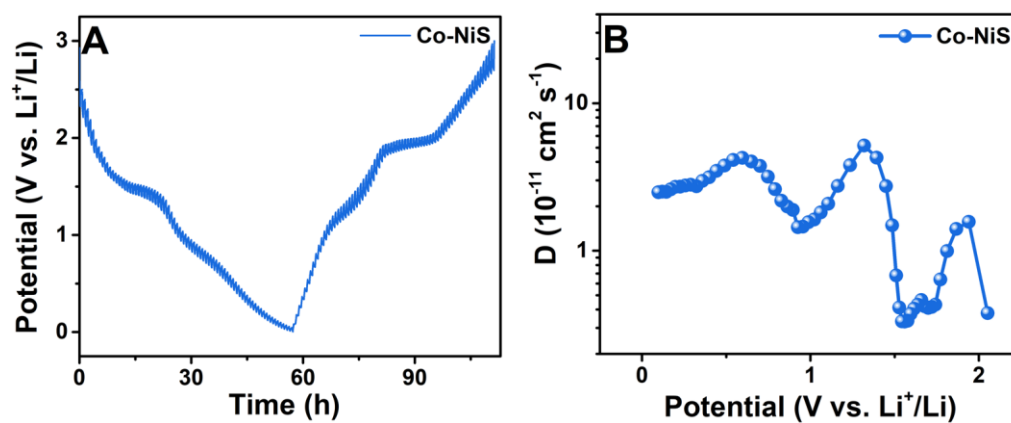

**Figure S18.** Electrochemical reaction kinetics analysis of Co-NiS. (A) GITT curves. (B) Diffusion coefficient ( $D_{\text{Li}^+}$ ).



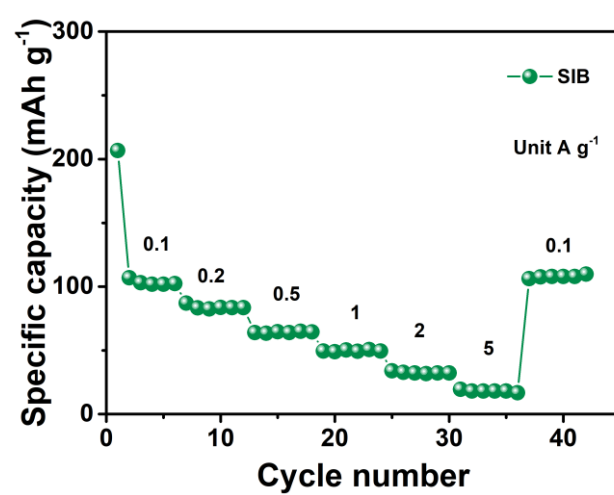

**Figure S19.** Rate performance of pure MXene for SIB.

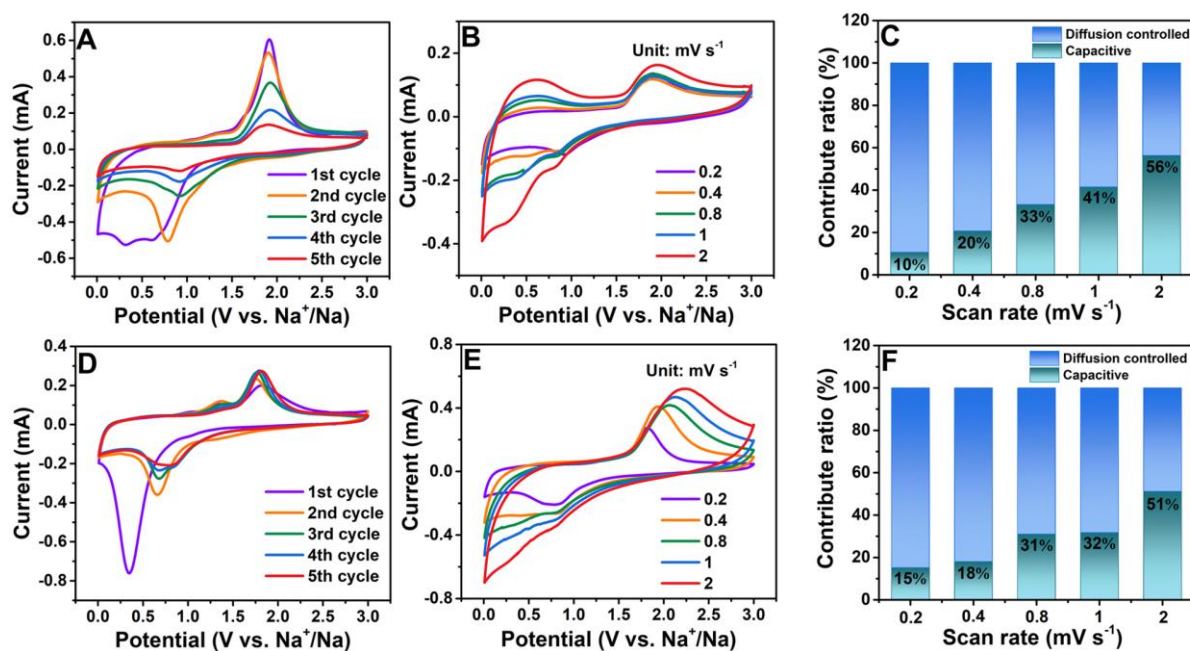

**Figure S20.** CV curves and capacitive contribution. (A-C) Ni<sub>9</sub>S<sub>8</sub>. (D-F) Co-NiS.

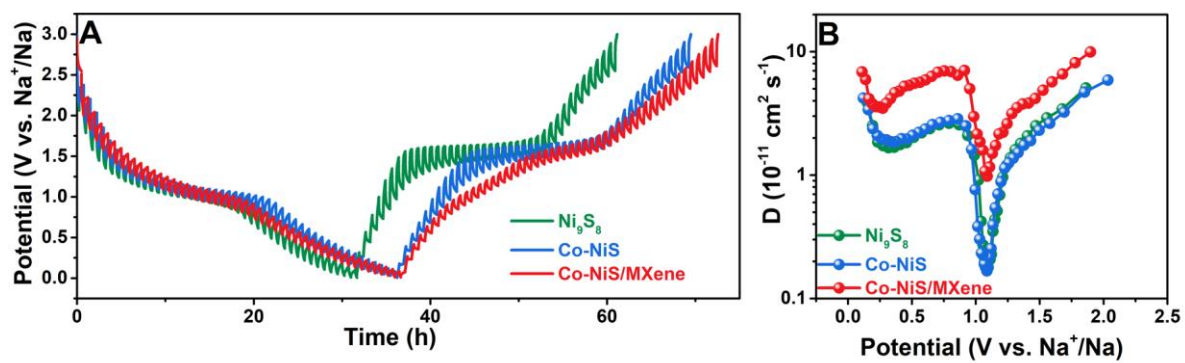

**Figure S21.** Electrochemical reaction kinetics analysis. (A) GITT curves. (B) Diffusion coefficient ( $D_{\text{Na}^+}$ ).

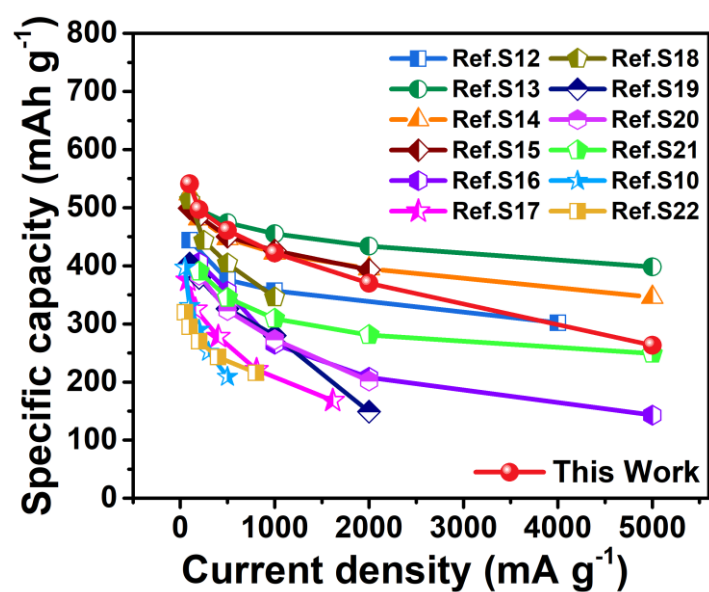

**Figure S22.** Comparison of the rate performance of the Co-NiS/MXene in sodium ion battery with those of the relevant materials reported recently in literature.

**Table S1.** Zeta potential of samples.

| Materials           | Ni <sub>9</sub> S <sub>8</sub> | Co-NiS | MXene | GO    | CNTs  | OA-GO | OA-CNTs |
|---------------------|--------------------------------|--------|-------|-------|-------|-------|---------|
| Zeta potential (mV) | 8.23                           | 2.12   | -39.5 | -20.3 | -37.7 | -2.17 | -0.80   |

**Table S2.** Comparison of the rate and cycle performance performances of the Co-NiS/MXene in lithium ion battery with those of the relevant materials reported recently in literature.

| Materials                              | Current density<br>(mA g <sup>-1</sup> ) | Specific capacity<br>(mAh g <sup>-1</sup> ) | Rate capability<br>(mAh g <sup>-1</sup> ) | Cycling stability (mAh g <sup>-1</sup> )         | Refs.            |
|----------------------------------------|------------------------------------------|---------------------------------------------|-------------------------------------------|--------------------------------------------------|------------------|
| Ni <sub>2</sub> P@C                    | 100                                      | 371                                         | 204 (1000 mA g <sup>-1</sup> )            | 398.5 (50 cycles @ 54.2 mA g <sup>-1</sup> )     | 1                |
| Co <sub>9</sub> S <sub>8</sub> @C      | 100                                      | 704                                         | 493 (2000 mA g <sup>-1</sup> )            | 823 (200 cycles @ 100 mA g <sup>-1</sup> )       | 2                |
| Ni <sub>3</sub> S <sub>2</sub>         | 100                                      | 689                                         | 467 (2000 mA g <sup>-1</sup> )            | 660.9 (60 cycles @ 100 mA g <sup>-1</sup> )      | 3                |
| NS/G-10                                | 70                                       | 834                                         | 141 (5000 mA g <sup>-1</sup> )            | 662 (200 cycles @ 70 mA g <sup>-1</sup> )        | 4                |
| Ni <sub>3</sub> S <sub>2</sub> @N-G    | 50                                       | 815                                         | 277 (4000 mA g <sup>-1</sup> )            | 809 (150 cycles @ 50 mA g <sup>-1</sup> )        | 5                |
| Ni <sub>3</sub> S <sub>2</sub> /Ni     | 50                                       | 299                                         | 185 (1750 mA g <sup>-1</sup> )            | 323 (100 cycles @ 170 mA g <sup>-1</sup> )       | 6                |
| NiS@OLC                                | 100                                      | 579                                         | 406 (4000 mA g <sup>-1</sup> )            | 546 (100 cycles @ 100 mA g <sup>-1</sup> )       | 7                |
| NiO/NiS/Ni <sub>3</sub> S <sub>2</sub> | 100                                      | 741                                         | 160 (3200 mA g <sup>-1</sup> )            | 499 (100 cycles @ 500 mA g <sup>-1</sup> )       | 8                |
| NiS@NSC                                | 100                                      | 601                                         | 446 (2000 mA g <sup>-1</sup> )            | 716 (200 cycles @ 100 mA g <sup>-1</sup> )       | 9                |
| NiS                                    | 100                                      | 784                                         | 410 (5000 mA g <sup>-1</sup> )            | 468 (100 cycles @ 1000 mA g <sup>-1</sup> )      | 10               |
| NiS-PPy-CNF                            | ---                                      | ---                                         | 306 (1000 mA g <sup>-1</sup> )            | 635 (100 cycles @ 100 mA g <sup>-1</sup> )       | 11               |
| <b>Co-NiS/MXene</b>                    | <b>100</b>                               | <b>911</b>                                  | <b>509 (2000 mA g<sup>-1</sup>)</b>       | <b>1120 (200 cycles @ 100 mA g<sup>-1</sup>)</b> | <b>This work</b> |

**Table S3.** Comparison of the rate and cycle performances of the Co-NiS/MXene in sodium ion battery with those of the relevant materials reported recently in literature.

| Materials                          | Current density<br>(mA g <sup>-1</sup> ) | Specific capacity<br>(mAh g <sup>-1</sup> ) | Rate capability<br>(mAh g <sup>-1</sup> ) | Cycling stability (mAh g <sup>-1</sup> )        | Refs.            |
|------------------------------------|------------------------------------------|---------------------------------------------|-------------------------------------------|-------------------------------------------------|------------------|
| CZS                                | 100                                      | 444                                         | 302 (4000 mA g <sup>-1</sup> )            | 294 (600 cycles @ 500 mA g <sup>-1</sup> )      | 12               |
| NMSCHSs                            | 100                                      | 516                                         | 398 (5000 mA g <sup>-1</sup> )            | 335 (200 cycles @ 1000 mA g <sup>-1</sup> )     | 13               |
| MSNBs                              | 100                                      | 524                                         | 395 (2000 mA g <sup>-1</sup> )            | 438 (100 cycles @ 200 mA g <sup>-1</sup> )      | 14               |
| NiS/GNSs                           | 100                                      | 499                                         | 393 (2000 mA g <sup>-1</sup> )            | 438 (100 cycles @ 200 mA g <sup>-1</sup> )      | 15               |
| NiS <sub>x</sub> /CNT@C            | 200                                      | 406                                         | 208 (2000 mA g <sup>-1</sup> )            | 340 (200 cycles @ 100 mA g <sup>-1</sup> )      | 16               |
| NiS <sub>2</sub> -GNS              | 81                                       | 168                                         | 467 (1614 mA g <sup>-1</sup> )            | 313 (200 cycles @ 81 mA g <sup>-1</sup> )       | 17               |
| NSRGO                              | 100                                      | 513                                         | 346 (1000 mA g <sup>-1</sup> )            | 391 (50 cycles @ 100 mA g <sup>-1</sup> )       | 18               |
| CoS/rGO                            | 100                                      | 404                                         | 149 (1000 mA g <sup>-1</sup> )            | 277 (100 cycles @ 200 mA g <sup>-1</sup> )      | 19               |
| CoS <sub>2</sub> /rGO              | 100                                      | 384                                         | 202 (2000 mA g <sup>-1</sup> )            | 251 (150 cycles @ 500 mA g <sup>-1</sup> )      | 20               |
| NiSe <sub>2</sub>                  | 200                                      | 390                                         | 281 (5000 mA g <sup>-1</sup> )            | 311 (100 cycles @ 100 mA g <sup>-1</sup> )      | 10               |
| NiS <sub>2</sub>                   | 100                                      | 331                                         | 209 (500 mA g <sup>-1</sup> )             | 281 (60 cycles @ 100 mA g <sup>-1</sup> )       | 21               |
| Ni <sub>3</sub> S <sub>2</sub> /Ni | 100                                      | 295                                         | 216 (800 mA g <sup>-1</sup> )             | 348 (100 cycles @ 50 mA g <sup>-1</sup> )       | 22               |
| <b>Co-NiS/MXene</b>                | <b>100</b>                               | <b>541</b>                                  | <b>422 (1000 mA g<sup>-1</sup>)</b>       | <b>409 (100 cycles @ 100 mA g<sup>-1</sup>)</b> | <b>This work</b> |

## REFERENCES

- (1) Zhang, R. Z.; Zhu, K. J.; Huang, J. D.; Yang, L. Y.; Li, S. T.; Wang, Z. Y.; Xie, J. R.; Wang, H.; Liu, J., Ultrafine Ni<sub>2</sub>P Nanoparticles Embedded in One-Dimensional Carbon Skeleton Derived from Metal-Organic Frameworks Template as a High-Performance Anode for Lithium Ion Battery. *J. Alloys Compd.* **2019**, 775, 490-497.
- (2) Wang, W.; Zeng, P.; Li, J.; Zhao, Y.; Chen, M.; Shao, J.; Fang, Z., Ultrathin Nanosheets Assembled Hierarchical Co/NiS<sub>x</sub>@C Hollow Spheres for Reversible Lithium Storage. *ACS Appl. Nano Mater.* **2018**, 1, 3435-3445.
- (3) Wang, Y.; Niu, Y.; Li, C. M., The Effect of the Morphologies of Ni<sub>3</sub>S<sub>2</sub> Anodes on the Performance of Lithium-Ion Batteries. *ChemistrySelect* **2017**, 2, 4445-4451.
- (4) AbdelHamid, A. A.; Yang, X.; Yang, J.; Chen, X.; Ying, J. Y., Graphene-Wrapped Nickel Sulfide Nanoprisms with Improved Performance for Li-Ion Battery Anodes and Supercapacitors. *Nano Energy* **2016**, 26, 425-437.
- (5) Zhu, J.; Li, Y.; Kang, S.; Wei, X.-L.; Shen, P. K., One-Step Synthesis of Ni<sub>3</sub>S<sub>2</sub> Nanoparticles Wrapped with *in Situ* Generated Nitrogen-Self-Doped Graphene Sheets with Highly Improved Electrochemical Properties in Li-Ion Batteries. *J. Mater. Chem. A* **2014**, 2, 3142-3147.
- (6) Su, C.-W.; Li, J.-M.; Yang, W.; Guo, J.-M., Electrodeposition of Ni<sub>3</sub>S<sub>2</sub>/Ni Composites as High-Performance Cathodes for Lithium Batteries. *J. Phys. Chem. C* **2013**, 118, 767-773.
- (7) Han, D.; Xiao, N.; Liu, B.; Song, G.; Ding, J., One-Pot Synthesis of Core/Shell-Structured NiS@Onion-Like Carbon Nanocapsule as a High-Performance Anode Material for Lithium-Ion Batteries. *Mater. Lett.* **2017**, 196, 119-122.
- (8) Wu, X.; Li, S.; Xu, Y.; Wang, B.; Liu, J.; Yu, M., Hierarchical Heterostructures of NiO Nanosheet Arrays Grown on Pine Twig-Like  $\beta$ -NiS@Ni<sub>3</sub>S<sub>2</sub> Frameworks as Free-Standing



- Integrated Anode for High-Performance Lithium-Ion Batteries. *Chem. Eng. J.* **2019**, *356*, 245-254.
- (9) Dong, X.; Deng, Z.-P.; Huo, L.-H.; Zhang, X.-F.; Gao, S., Large-Scale Synthesis of NiS@N and S Co-Doped Carbon Mesoporous Tubule as High Performance Anode for Lithium-Ion Battery. *J. Alloys Compd.* **2019**, *788*, 984-992.
- (10) Fan, H.; Yu, H.; Wu, X.; Zhang, Y.; Luo, Z.; Wang, H.; Guo, Y.; Madhavi, S.; Yan, Q., Controllable Preparation of Square Nickel Chalcogenide (NiS and NiSe<sub>2</sub>) Nanoplates for Superior Li/Na Ion Storage Properties. *ACS Appl. Mater. Interfaces* **2016**, *8*, 25261-25267.
- (11) Li, X.; Chen, Y.; Zou, J.; Zeng, X.; Zhou, L.; Huang, H., Stable Freestanding Li-ion Battery Cathodes by *in Situ* Conformal Coating of Conducting Polypyrrole on NiS-Carbon Nanofiber Films. *J. Power Sources* **2016**, *331*, 360-365.
- (12) Ren, W.-F.; Zhou, Y.; Li, J.-T.; Huang, L.; Sun, S.-G., Si Anode for Next-Generation Lithium-Ion Battery. *Curr. Opin. Electrochem.* **2019**, *18*, 46-54.
- (13) Xie, H.; Chen, M.; Wu, L., Hierarchical Nanostructured NiS/MoS<sub>2</sub>/C Composite Hollow Spheres for High Performance Sodium-Ion Storage Performance. *ACS Appl. Mater. Interfaces* **2019**, *11*, 41222-41228.
- (14) Wang, X.; Chen, Y.; Fang, Y.; Zhang, J.; Gao, S.; Lou, X. W. D., Synthesis of Cobalt Sulfide Multi-Shelled Nanoboxes with Precisely Controlled Two to Five Shells for Sodium-Ion Batteries. *Angew. Chem. Int. Ed.* **2019**, *58*, 2675-2679.
- (15) Wang, J.; Cao, D.; Yang, G.; Yang, Y.; Wang, H., Synthesis of NiS/Carbon Composites as Anodes for High-Performance Sodium-Ion Batteries. *J. Solid State Electr.* **2017**, *21*, 3047-3055.
- (16) Zhao, F.; Gong, Q.; Traynor, B.; Zhang, D.; Li, J.; Ye, H.; Chen, F.; Han, N.; Wang, Y.; Sun, X.; Li, Y., Stabilizing Nickel Sulfide Nanoparticles with an Ultrathin Carbon Layer

- for Improved Cycling Performance in Sodium Ion Batteries. *Nano Res.* **2016**, *9*, 3162-3170.
- (17) Wang, T.; Hu, P.; Zhang, C.; Du, H.; Zhang, Z.; Wang, X.; Chen, S.; Xiong, J.; Cui, G., Nickel Disulfide-Graphene Nanosheets Composites with Improved Electrochemical Performance for Sodium Ion Battery. *ACS Appl. Mater. Interfaces* **2016**, *8*, 7811-7817.
- (18) Qin, W.; Chen, T.; Lu, T.; Chua, D. H. C.; Pan, L., Layered Nickel Sulfide-Reduced Graphene Oxide Composites Synthesized *via* Microwave-Assisted Method as High Performance Anode Materials of Sodium-Ion Batteries. *J. Power Sources* **2016**, *302*, 202-209.
- (19) Zhu, X.; Jiang, X.; Liu, X.; Xiao, L.; Ai, X.; Yang, H.; Cao, Y., Amorphous CoS Nanoparticle/Reduced Graphene Oxide Composite as High-Performance Anode Material for Sodium-Ion Batteries. *Ceram. Int.* **2017**, *43*, 9630-9635.
- (20) Li, Z.; Feng, W.; Lin, Y.; Liu, X.; Fei, H., Flaky CoS<sub>2</sub> and Graphene Nanocomposite Anode Materials for Sodium-Ion Batteries with Improved Performance. *RSC Adv.* **2016**, *6*, 70632-70637.
- (21) Zhu, K. J.; Liu, G.; Wang, Y. J.; Liu, J.; Li, S. T.; Yang, L. Y.; Liu, S. L.; Wang, H.; Xie, T., Metal-Organic Frameworks Derived Novel Hierarchical Durian-Like Nickel Sulfide (NiS<sub>2</sub>) as an Anode Material for High-Performance Sodium-Ion Batteries. *Mater. Lett.* **2017**, *197*, 180-183.
- (22) Song, X.; Li, X.; Bai, Z.; Yan, B.; Li, D.; Sun, X., Morphology-Dependent Performance of Nanostructured Ni<sub>3</sub>S<sub>2</sub>/Ni Anode Electrodes for High Performance Sodium Ion Batteries. *Nano Energy* **2016**, *26*, 533-540.
